# Supplementary material for: Population-, sex- and individual level divergence in life-history and activity patterns in an annual killifish
Source: PeerJ journal article supplement (doi:10.7717/peerj.7177), 2019-06-27

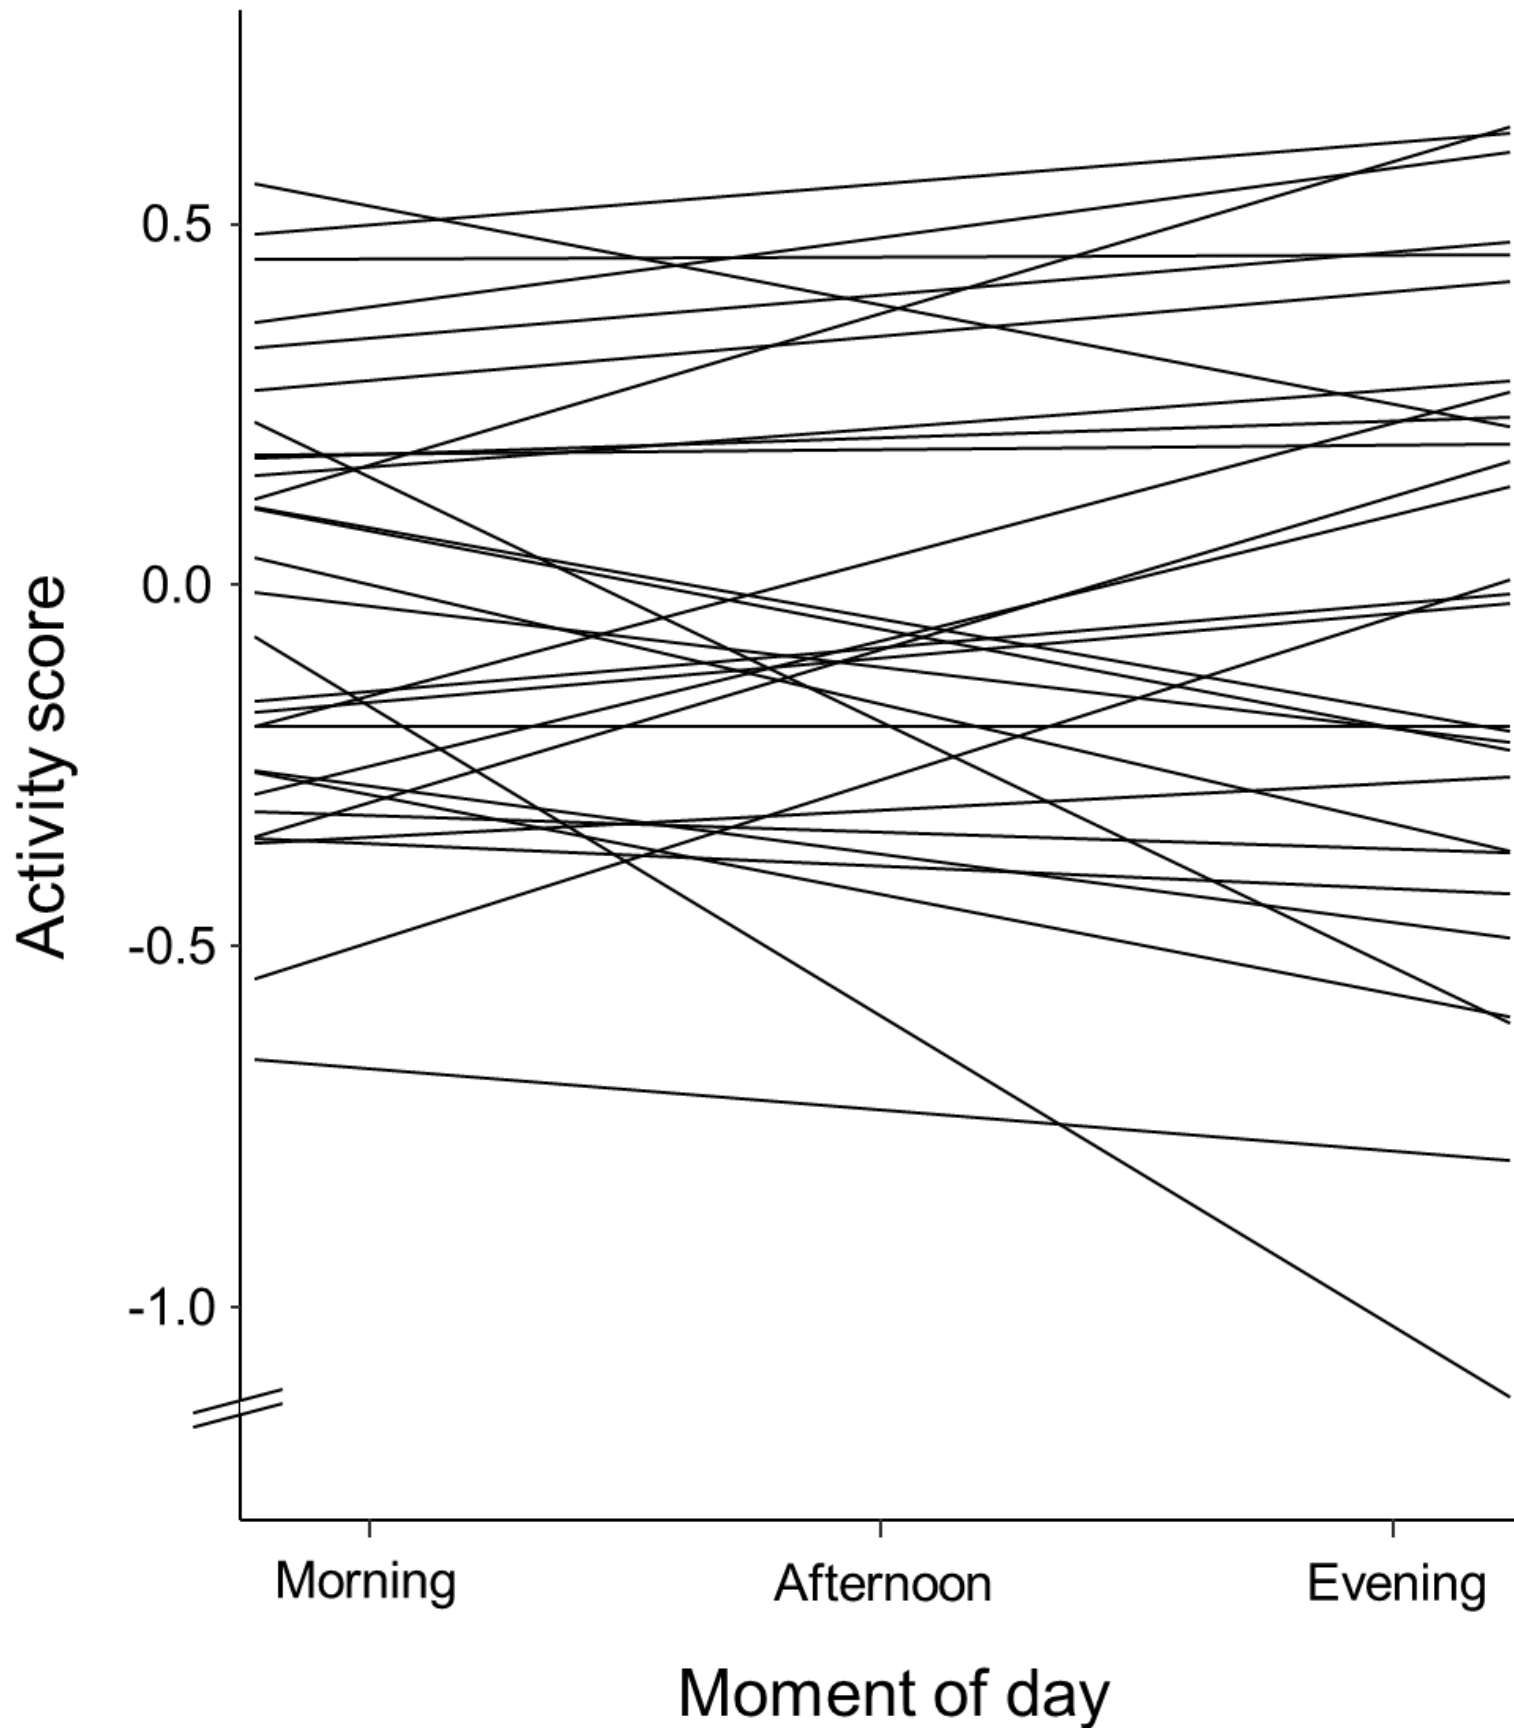

Supplement: Supplemental_Figure_S5.pdf [file Supplemental_Figure_S5.pdf]
